# Supplementary material
Source: PubMed Central journal article supplement (PMC3674669)
Supplement: supp_blood-2012-10-461442_blood-2012-10-461442-1.pdf [file supp_blood-2012-10-461442_blood-2012-10-461442-1.pdf]

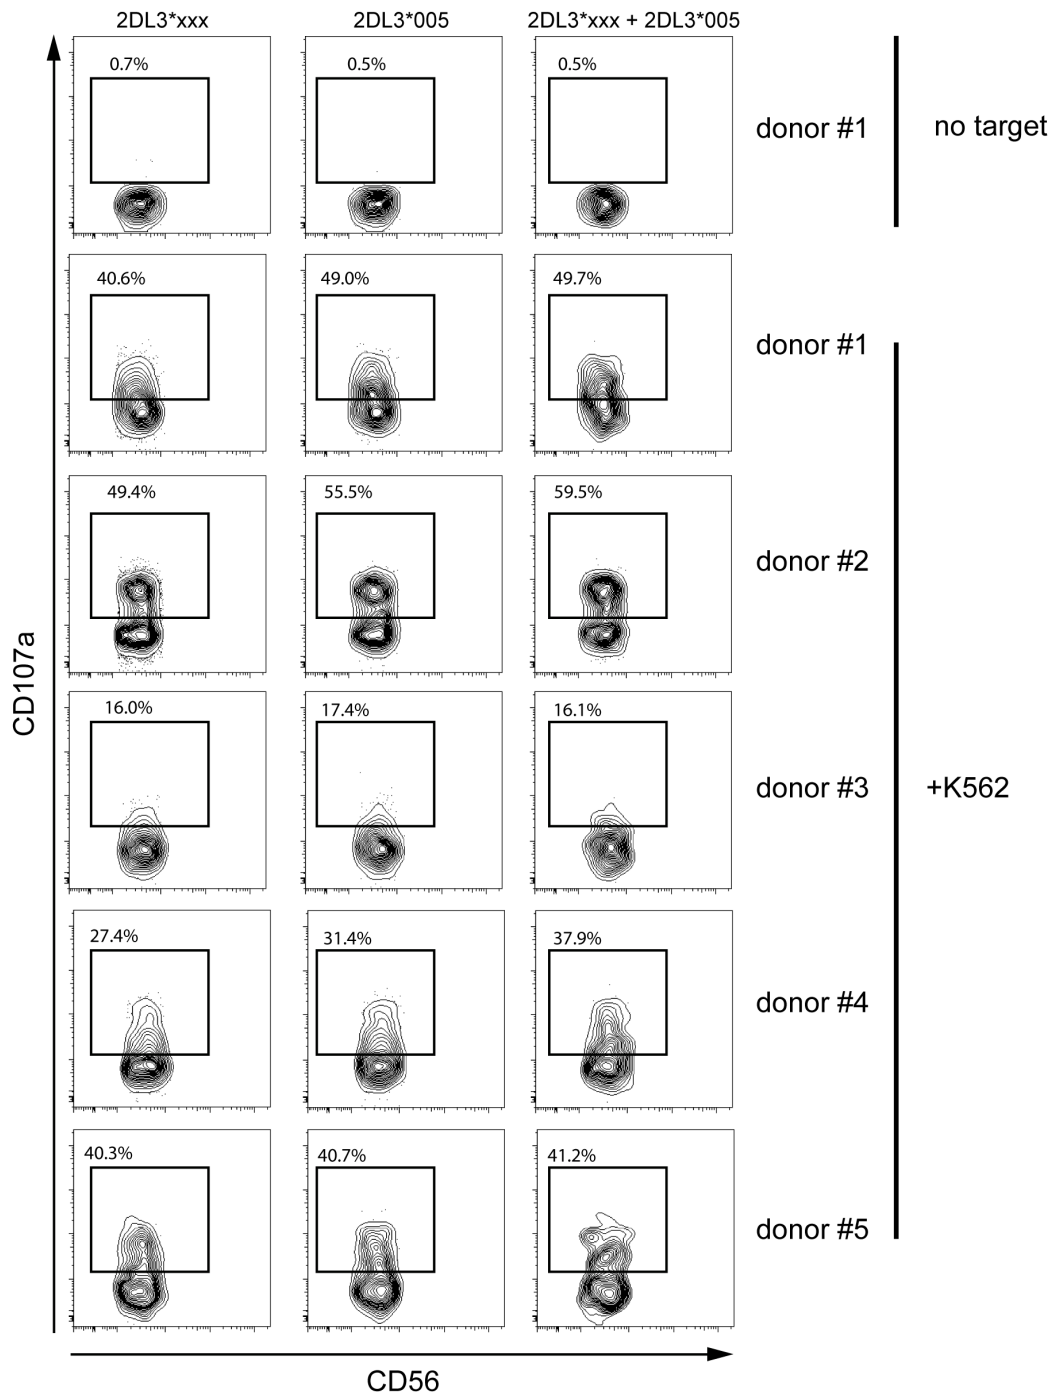

**Supplementary Figure 1:** CD107a expression (degranulation) following stimulation with K562 cells in NK cell subsets expressing different combinations of KIR2DL3 alleles.

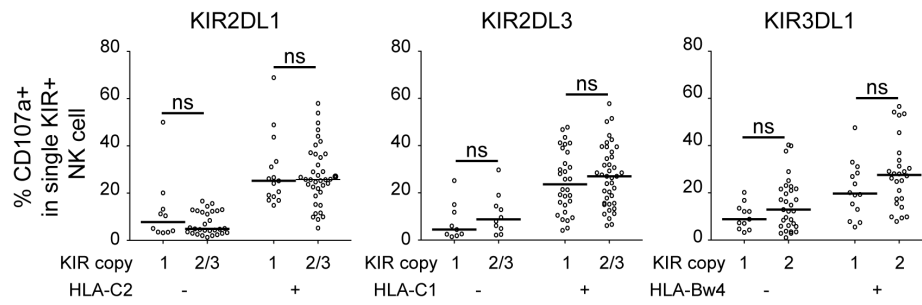

**Supplementary Figure 2:** Degranulation of single KIR positive NK cells in donors stratified based on KIR gene CNV and presence or absence of the corresponding KIR ligand.
